# Supplementary material for: Quantifying Head Leakage Radiation in CyberKnife robotic radiosurgery Systems: A Multi-Modal Approach
Source: Research Square preprint supplement (doi:10.21203/rs.3.rs-6424742/v1), 2025-05-09
Supplement: Supplementary file 1 [file 7e3f8570993dc9490e2df8c0.xlsx]

## Sheet: fixed Graphs
	fixed collimator			TRANSMISSION			TRANSMISSION (%)
	IC(nC)	SM(R/H)	OSLD(mSv)	IC	SM	OSLD
OPEN READING	113.7	60000	86.8623
points							IC	SM	OSLD
1	0.023	7.3	0.11858	0.000202287	0.000121667	0.00136515	0.0202287	0.0121667	0.136515
2	0.02	7.3	0.10581	0.000175901	0.000121667	0.00121813	0.0175901	0.0121667	0.121813
3	0.024	7.2	0.12273	0.000211082	0.00012	0.00141293	0.0211082	0.012	0.141293
4	0.021	7.2	0.1122	0.000184697	0.00012	0.0012917	0.0184697	0.012	0.12917
5	0.0211	7.2	0.12806	0.000185576	0.00012	0.00147429	0.0185576	0.012	0.147429
6	0.03	7.1	0.12098	0.000263852	0.000118333	0.00139278	0.0263852	0.0118333	0.139278
7	0.029	7.2	0.14538	0.000255057	0.00012	0.00167368	0.0255057	0.012	0.167368
8	0.018	7.3	0.09773	0.000158311	0.000121667	0.00112511	0.0158311	0.0121667	0.112511
10	0.011	5.6	0.05019	9.67458e-05	9.33333e-05	0.000577811	0.00967458	0.00933333	0.0577811
11	0.008	3.7	0.04322	7.03606e-05	6.16667e-05	0.000497569	0.00703606	0.00616667	0.0497569
12	0.01	5.4	0.04368	8.79507e-05	9e-05	0.000502865	0.00879507	0.009	0.0502865
13	0.011	6.1	0.04283	9.67458e-05	0.000101667	0.000493079	0.00967458	0.0101667	0.0493079
14	0.008	4.4	0.04654	7.03606e-05	7.33333e-05	0.000535791	0.00703606	0.00733333	0.0535791
15	0.0085	4.2	0.04788	7.47581e-05	7e-05	0.000551217	0.00747581	0.007	0.0551217
16	0.0098	4.6	0.07176	8.61917e-05	7.66667e-05	0.000826135	0.00861917	0.00766667	0.0826135

## Sheet: IRIS graphs
	IRIS collimator			TRANSMISSION			TRANSMISSION(%)
	IC(nC)	SM(R/H)	OSLD(mSv)	IC	SM	OSLD
OPEN READING	113.7	60000	86.8623				IC	SM	OSLD
1	0.024	7.2	0.11886	0.000211082	0.00012	0.00136837	0.0211082	0.012	0.136837
2	0.028	7.2	0.10096	0.000246262	0.00012	0.0011623	0.0246262	0.012	0.11623
3	0.023	7.2	0.1152	0.000202287	0.00012	0.00132624	0.0202287	0.012	0.132624
4	0.174	7.2	0.10784	0.00153034	0.00012	0.00124151	0.153034	0.012	0.124151
5	0.021	7.2	0.12021	0.000184697	0.00012	0.00138391	0.0184697	0.012	0.138391
6	0.0257	7.2	0.12775	0.000226033	0.00012	0.00147072	0.0226033	0.012	0.147072
7	0.0297	7.1	0.14553	0.000261214	0.000118333	0.00167541	0.0261214	0.0118333	0.167541
8	0.0178	7.3	0.10895	0.000156552	0.000121667	0.00125428	0.0156552	0.0121667	0.125428
10	0.01	5.4	0.01265	8.79507e-05	9e-05	0.000145633	0.00879507	0.009	0.0145633
11	0.009	4.3	0.04667	7.91557e-05	7.16667e-05	0.000537287	0.00791557	0.00716667	0.0537287
12	0.0094	5.1	0.04498	8.26737e-05	8.5e-05	0.000517831	0.00826737	0.0085	0.0517831
13	0.0074	5.9	0.04453	6.50836e-05	9.83333e-05	0.00051265	0.00650836	0.00983333	0.051265
14	0.0085	3.7	0.04154	7.47581e-05	6.16667e-05	0.000478228	0.00747581	0.00616667	0.0478228
15	0.01	4.9	0.0589	8.79507e-05	8.16667e-05	0.000678085	0.00879507	0.00816667	0.0678085
16	0.00927	4.1	0.04703	8.15303e-05	6.83333e-05	0.000541432	0.00815303	0.00683333	0.0541432

## Sheet: Out patient plane
							Back to Home Page
	MU used	500 MU
	Elelctrometer	PTW UNIDOS
		Position	6.4.3 Other than Patient Plane Leakage (FIXED)
				MU Delivered 500 MU				FIXED	IRIS
			Meter Readings in nC	Percentage of Transmission				0.0349543	0.020591
	60 mm Collimator		9.727					0.0390665	0.0308864
	Blank Collimator	A	0.0034	0.0349543				0.0442068	0.0236796
		B	0.0038	0.0390665				0.0349543	0.0329455
		C	0.0043	0.0442068				0.0400946	0.0442706
		D	0.0034	0.0349543				0.0493472	0.0442706
		E	0.0039	0.0400946				0.0390665	0.0463297
		F	0.0048	0.0493472				0.030842	0.0525069
		G	0.0038	0.0390665				0.0205613	0.0494183
		H	0.003	0.030842
		I	0.002	0.0205613
			Max % of Transmission	0.0493472
			Avg % of Transmission	0.0370104
		Position	6.4.3 Other than Patient Plane Leakage (IRIS)
				MU Delivered 500 MU
			Meter Readings in nC	Percentage of Transmission
	Irish		9.713
	Fully Closed	A	0.002	0.020591
		B	0.003	0.0308864
		C	0.0023	0.0236796
		D	0.0032	0.0329455
		E	0.0043	0.0442706
		F	0.0043	0.0442706
		G	0.0045	0.0463297
		H	0.0051	0.0525069
		I	0.0048	0.0494183
			Max % of Transmission	0.0525069
			Avg % of Transmission	0.0383221
